# Supplementary material for: A novel pathogenic germline chromosome 3 inversion in von Hippel-Lindau disease
Source: PubMed Central journal article supplement — J Med Genet. 2024 Sep 24;61(11):e110202. doi: 10.1136/jmg-2024-110202 (PMC11503160; doi:10.1136/jmg-2024-110202), 2024-09-24
Supplement: jmg-61-11-s001.pdf [file jmg-61-11-s001.pdf]

## Supplementary Data

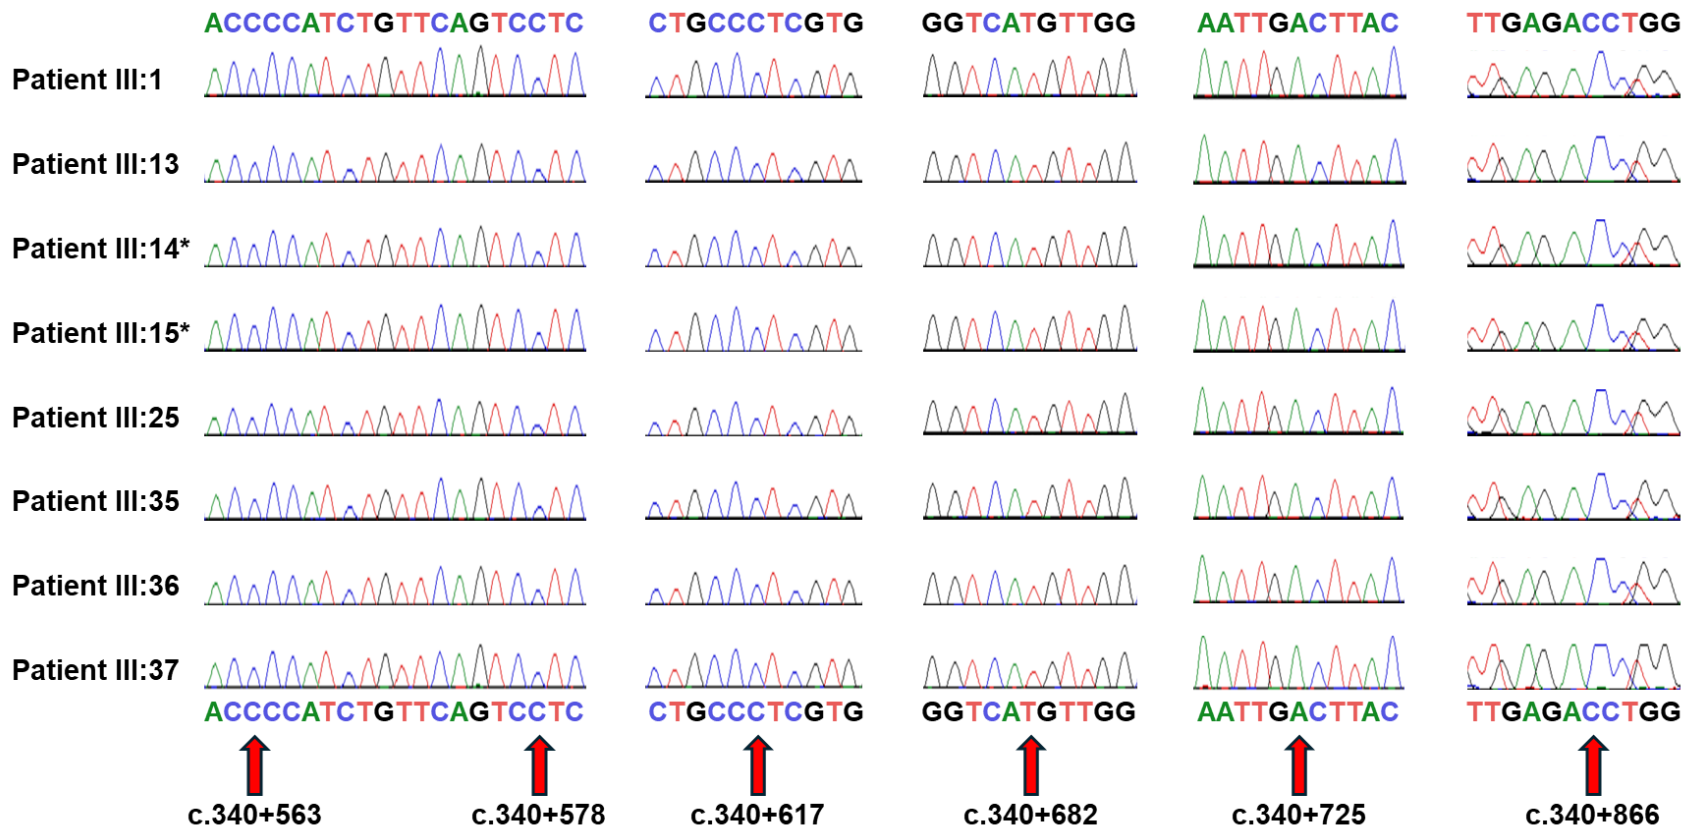

### Supplementary Figure 1: Sanger sequencing of the *VHL* E1' cryptic exon

DNA sequencing of the E1' cryptic exon was performed on eight family members, all of whom exhibited wild type sequences, including at c.340+617 and c.340+682, which have been reported as pathogenic variants, and additional loci that have been reported as benign or VUS [12]. Primer sequences were as follows: forward GAATAGTTTGCATTTGAAGGTG, reverse TCACCTTTTAAGCATCCTCTC. \* denotes family members (III:14 and III:15) who have no clinical manifestations of *VHL* disease, while the other six patients have at least one manifestation.

## Multiplex Primer Design

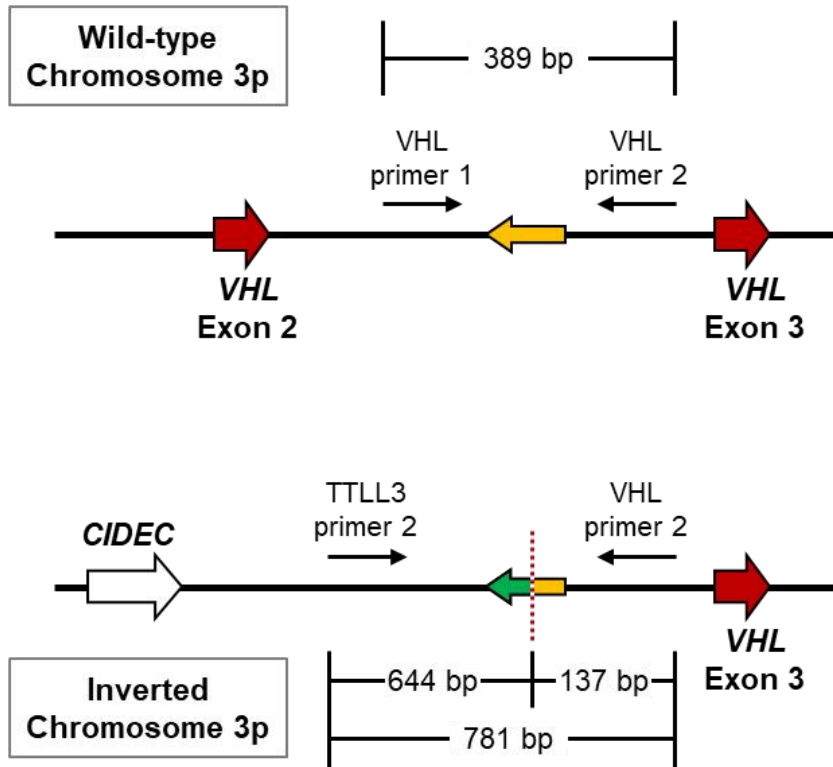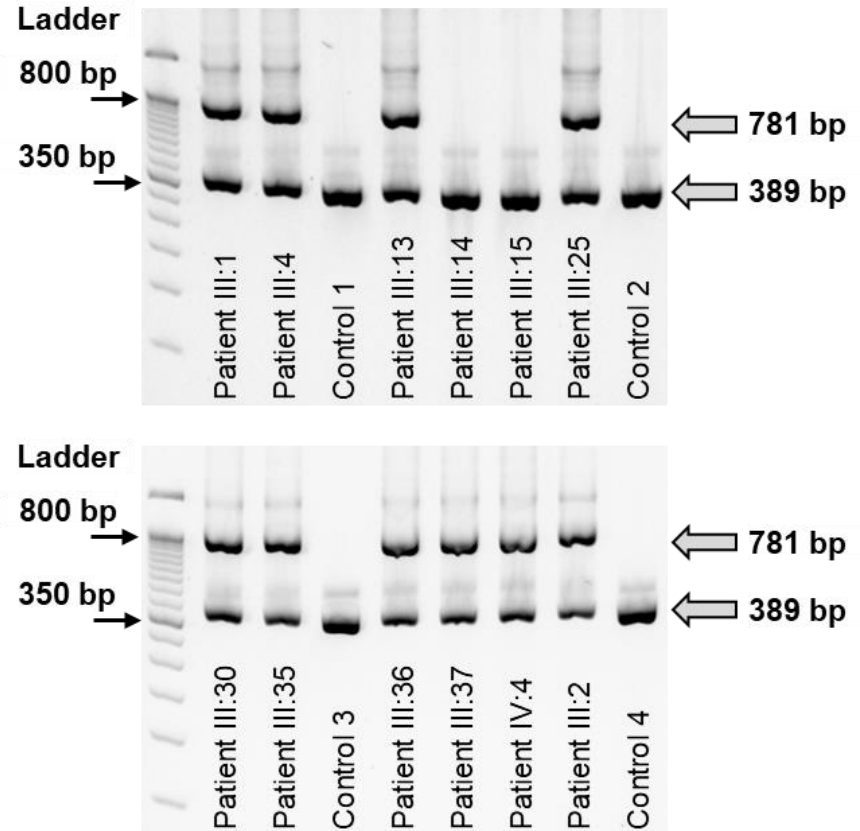

### Supplementary Figure S2: Multiplex PCR-based analysis of germline DNA

Multiplex PCR primer sets were designed to identify both the wild-type sequence between the second and third exons of the *VHL* gene and across the breakpoint created by the chromosome 3p inversion, creating 389 bp and 781 bp fragments respectively. Twelve individuals from the family were evaluated with ten demonstrating evidence of both the wild-type and inversion induced fragments, indicating the germline presence of the inversion. Four control DNAs from unrelated, unaffected individuals and two family members (III:14 and III:15) only demonstrated the wild-type fragment.

A

Patient III:1

Tumor 1

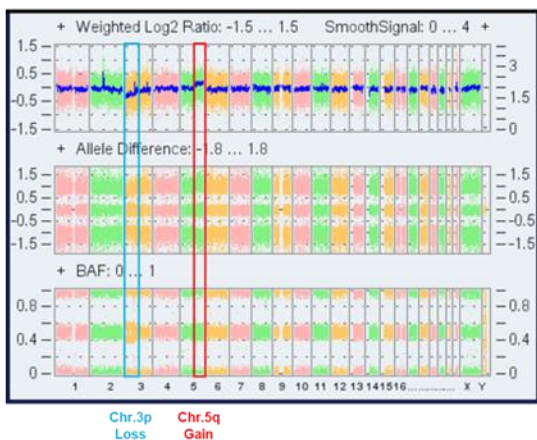

Tumor 2

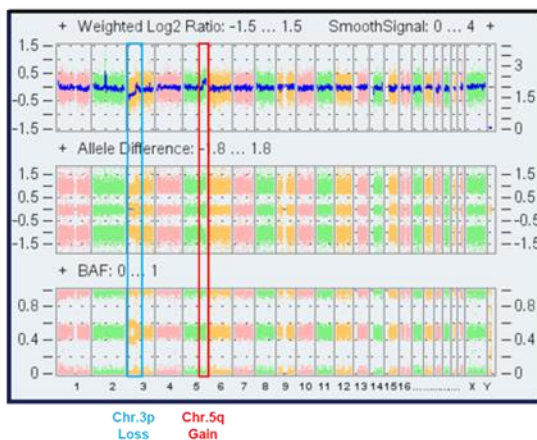

Tumor 3

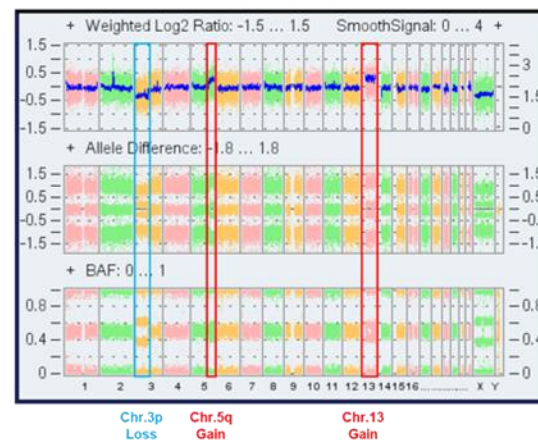

B

Patient III:25

Tumor 1

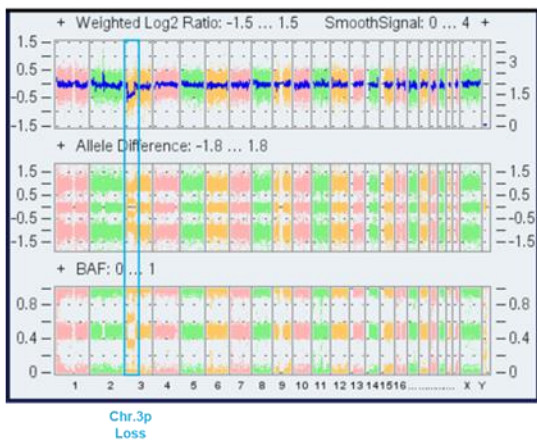

Tumor 2

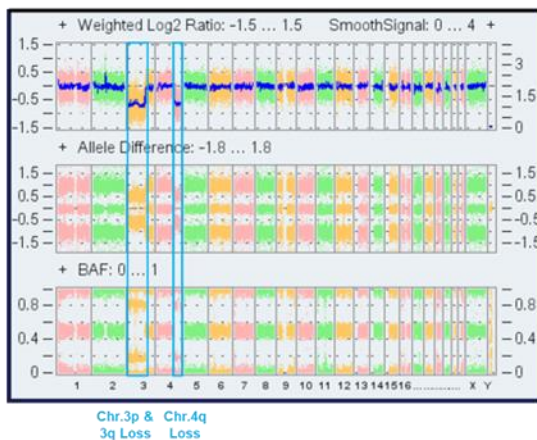

Tumor 3

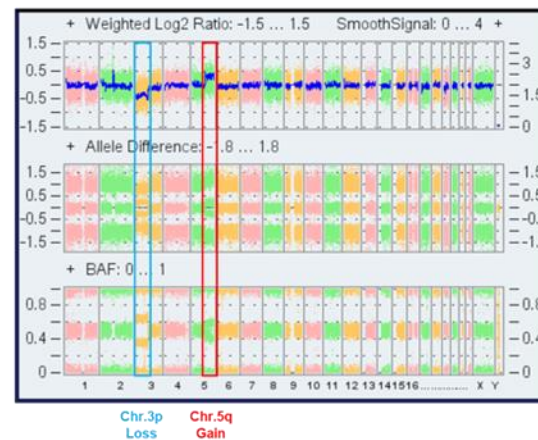

C

### Patient III:35

**Tumor 1**

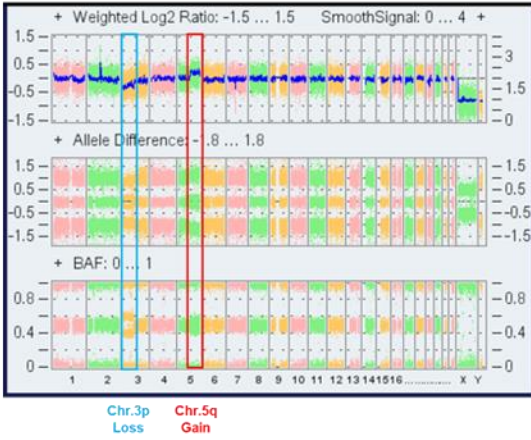

**Tumor 2**

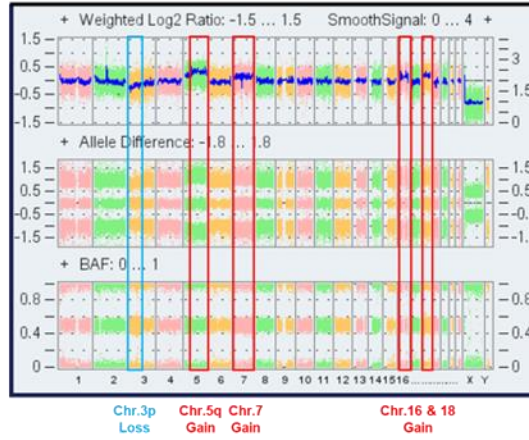

**Tumor 3**

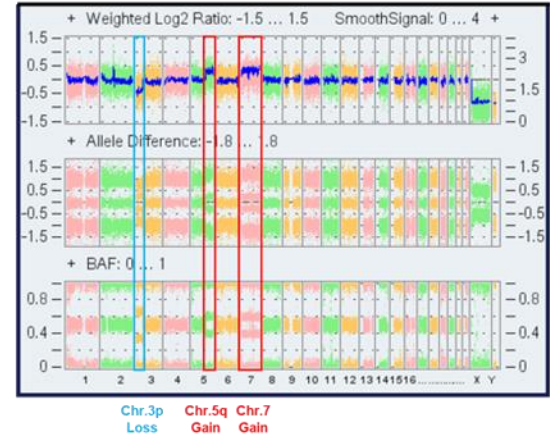

**Tumor 4**

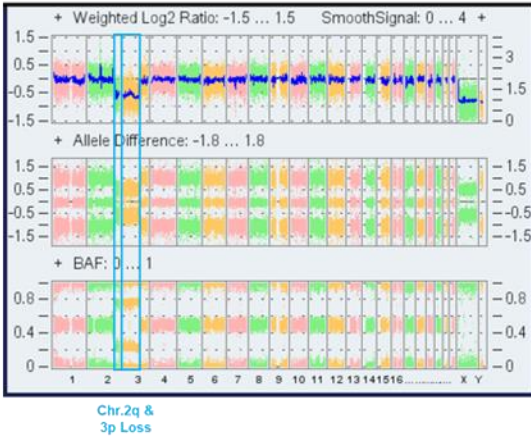

**Tumor 5**

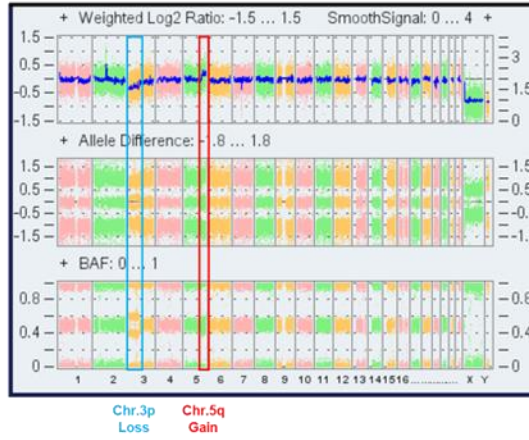

**Tumor 6**

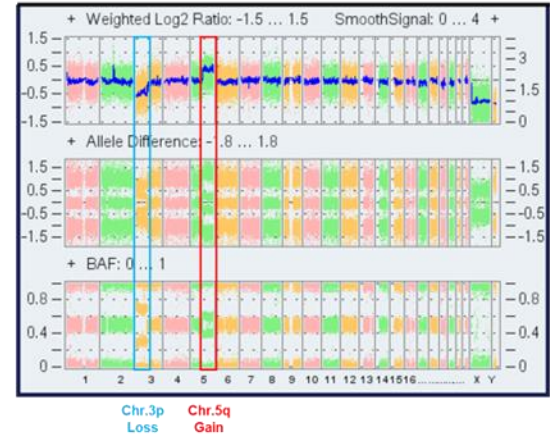

C cont..

### Patient III:35

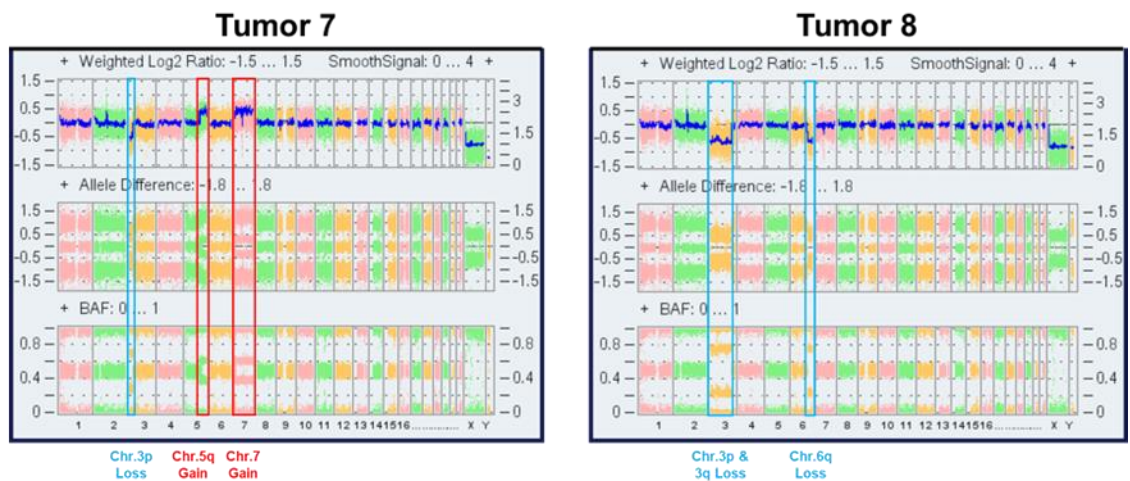

### Supplementary Figure S3: OncoScan analysis of chromosomal copy number alterations in tumor DNA

Fourteen tumor DNAs were evaluated using the OncoScan CNV assay and significant copy number events were highlighted. Three tumors were available for both patient III:1 (A) and patient III:25 (B). Eight tumors were assessed from patient III:35 (C).

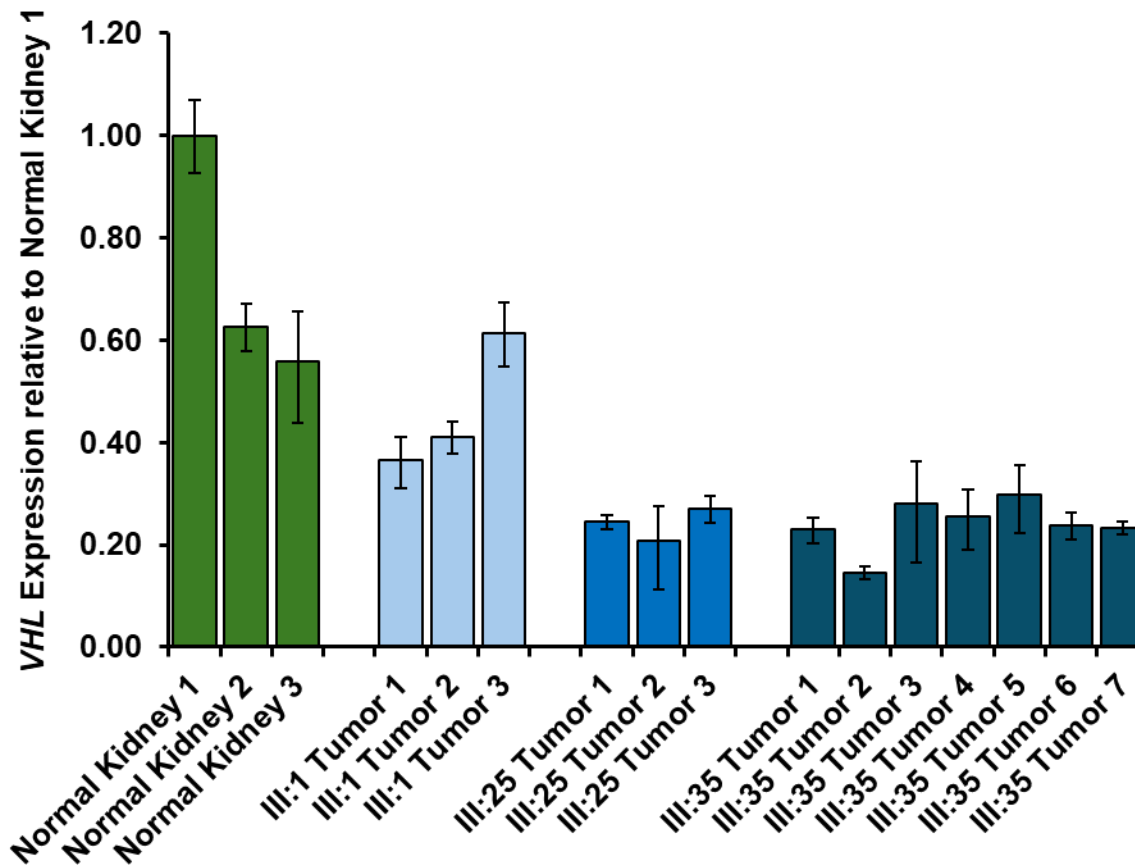

#### Supplementary Figure S4: Expression analysis of *VHL* mRNA in ccRCCs

Expression analysis of *VHL* was performed on 13 ccRCCs from patients III:1 (n=3), III:25 (n=3), and III:35 (n=7) and compared to normal kidney samples derived from three independent, unrelated *VHL* patients. All values are presented as the relative expression of *VHL* in comparison to the normal kidney 1 sample. Expression was normalized by 18S expression.

**Supplementary Table S1: PCR primer sequences**

| <b>Primer</b> | <b>Sequence</b>       |
|---------------|-----------------------|
| TTLL3 1       | TGGAAGTCTGTCTTGTGCTAC |
| TTLL3 2       | GACTAGGTGTTGGTTTGGTG  |
| VHL1          | GGATACCCAATTCAGTTGTAC |
| VHL2          | TAGTTTTGGGGTGGTAGTCAC |

**Supplementary Table S2: Clinical Manifestations**

| Patient | Clinical Manifestations of VHL Syndrome |          |     |      |      |         | Germline status         | Mortality Status |
|---------|-----------------------------------------|----------|-----|------|------|---------|-------------------------|------------------|
|         | Kidney                                  | Pancreas | CNS | Pheo | ELST | Retinal |                         |                  |
| II:2    | Yes                                     | Yes      |     |      |      |         | n.d.                    | d.50s            |
| II:4    | Yes                                     |          | Yes |      |      |         | n.d.                    | d.70s            |
| II:6    |                                         |          |     |      |      |         | n.d. (obligate carrier) | Alive – 50s      |
| II:7    | Yes                                     |          | Yes |      |      |         | n.d.                    | d.50s            |
| II:8    |                                         |          | Yes |      |      |         | n.d.                    | d.40s            |
| II:10   | Yes                                     | Yes      | Yes | Yes  |      |         | n.d.                    | Alive – 50s      |
| II:11   | Yes                                     |          | Yes |      |      |         | n.d.                    | d.40s            |
| II:12   |                                         | Yes      |     |      |      |         | n.d.                    | d.20s            |
| III:1   | Yes                                     | Yes      | Yes |      |      |         | Positive                | Alive – 20s      |
| III:2   | Yes                                     | Cysts    | Yes |      |      |         | Positive                | Alive – 30s      |
| III:3   |                                         |          |     |      |      | Yes     | n.d.                    | d.20s            |
| III:4   |                                         |          | Yes |      |      |         | Positive                | Alive – 30s      |
| III:5   |                                         |          | Yes |      |      |         | n.d.                    | Alive – 30s      |
| III:13  | Yes                                     | Cysts    | Yes |      |      |         | Positive                | Alive – 30s      |
| III:21  |                                         |          | Yes |      |      |         | n.d.                    | Alive – 30s      |
| III:23  |                                         |          | Yes |      |      |         | n.d.                    | Alive – 20s      |
| III:24  | Yes                                     |          |     |      |      |         | n.d.                    | d.20s            |
| III:25  | Yes                                     | Yes      | Yes | Yes  | Yes  | Yes     | Positive                | Alive – 30s      |
| III:30  | Yes                                     | Yes      | Yes |      | Yes  |         | Positive                | Alive – 20s      |
| III:35  | Yes                                     |          | Yes |      |      |         | Positive                | Alive – 30s      |
| III:36  | Cysts                                   | Cysts    |     |      |      |         | Positive                | Alive – 20s      |
| III:37  |                                         | Cysts    |     |      |      |         | Positive                | Alive – teens    |
| IV:4    |                                         |          |     |      |      |         | Positive                | Alive – teens    |



**Supplementary Table S3: Renal Tumor Characteristics**

| Patient Tumors | Age at Surgery | Laterality | Size (cm)<br>WHO/ISUP Grade | Chr. 3p<br>Loss | Chr. 5q<br>Gain | Additional Genetic<br>Alterations |
|----------------|----------------|------------|-----------------------------|-----------------|-----------------|-----------------------------------|
| III:1 – 1      | 20s            | Right      | 1.3 – FNG2                  | Yes             | Yes             |                                   |
| III:1 – 2      | 20s            | Right      | 2.0 – FNG2                  | Yes             | No              |                                   |
| III:1 – 3      | 20s            | Right      | 0.8 – FNG2                  | Yes             | Yes             | Chr. 13 Gain                      |
| III:25 – 1     | 30s            | Left       | 4.0 – FNG2                  | Yes             | No              | <i>MTOR, TET2</i>                 |
| III:25 – 2     | 30s            | Left       | 1.1 – FNG2                  | Yes             | No              | Chr. 3q & 4q Loss                 |
| III:25 – 3     | 30s            | Left       | 0.8 – FNG2                  | Yes             | Yes             |                                   |
| III:35 – 1     | 20s            | Right      | 1.9 – FNG2                  | Yes             | Yes             |                                   |
| III:35 – 2     | 20s            | Right      | 0.9 – FNG2                  | Yes             | Yes             | Chr. 7, 16 & 18 Gain              |
| III:35 – 3     | 20s            | Right      | 2.9 – FNG2                  | Yes             | Yes             | Chr. 7 Gain                       |
| III:35 – 4     | 20s            | Right      | 1.2 – FNG2                  | Yes             | No              | Chr. 2q & 3q Loss                 |
| III:35 – 5     | 20s            | Right      | 0.6 – FNG2                  | Yes             | Yes             |                                   |
| III:35 – 6     | 20s            | Right      | 0.8 – FNG2                  | Yes             | Yes             |                                   |
| III:35 – 7     | 20s            | Right      | 1.1 – FNG2                  | Focal           | Yes             | Chr. 7 Gain                       |
| III:35 – 8     | 20s            | Right      | 0.5 – FNG2                  | Yes             | No              | Chr. 3q & 6q Loss                 |
